# Supplementary material for: Synthesis of PP2A-Activating PF-543 Derivatives and Investigation of Their Inhibitory Effects on Pancreatic Cancer Cells
Source: MDPI journal article supplement (doi:10.3390/molecules27103346), 2022-05-23
Supplement: s1 [file s1]

Supplementary Figure 1

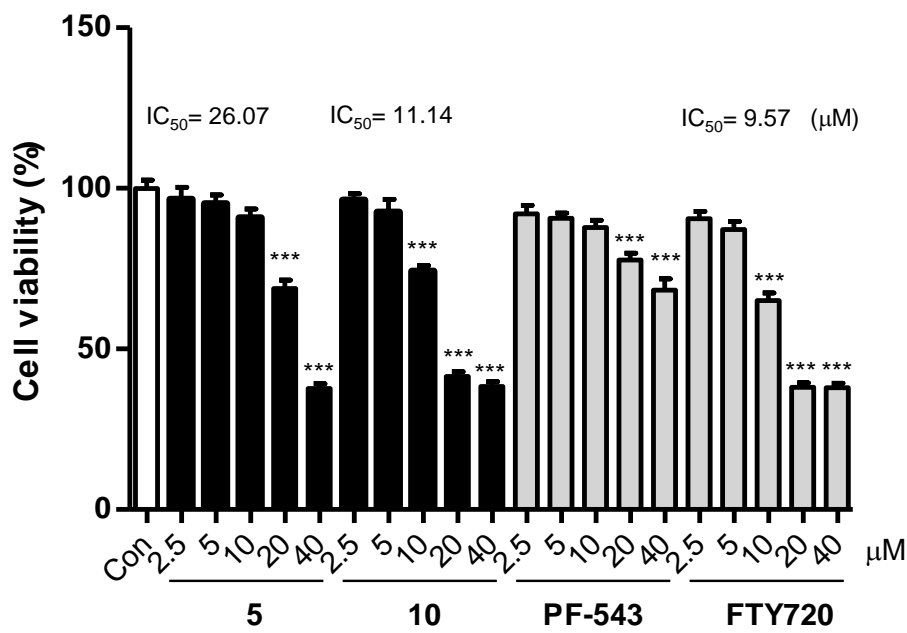

**Supplementary Figure 1. Relative IC<sub>50</sub> determination of Compound 5, Compound 10, PF-543, and FTY720.** MIA PaCa2 cells were seeded in 96 well plates and treated with 2.5-40 μM of compounds for 24h. Cell viability was assessed using MTT assay, and Relative IC<sub>50</sub> was determined using Graph pad prism software. The result is representative of three independent experiments and data are presented as mean ± SD. \*\*\*  $p < 0.001$  compared with non-treated control group.
